# Supplementary figures and images for: Targeted Sequencing of Mitochondrial Genes Reveals Signatures of Molecular Adaptation in a Nearly Panmictic Small Pelagic Fish Species
Source: MDPI journal article supplement (doi:10.3390/genes12010091), 2021-01-13

# A)

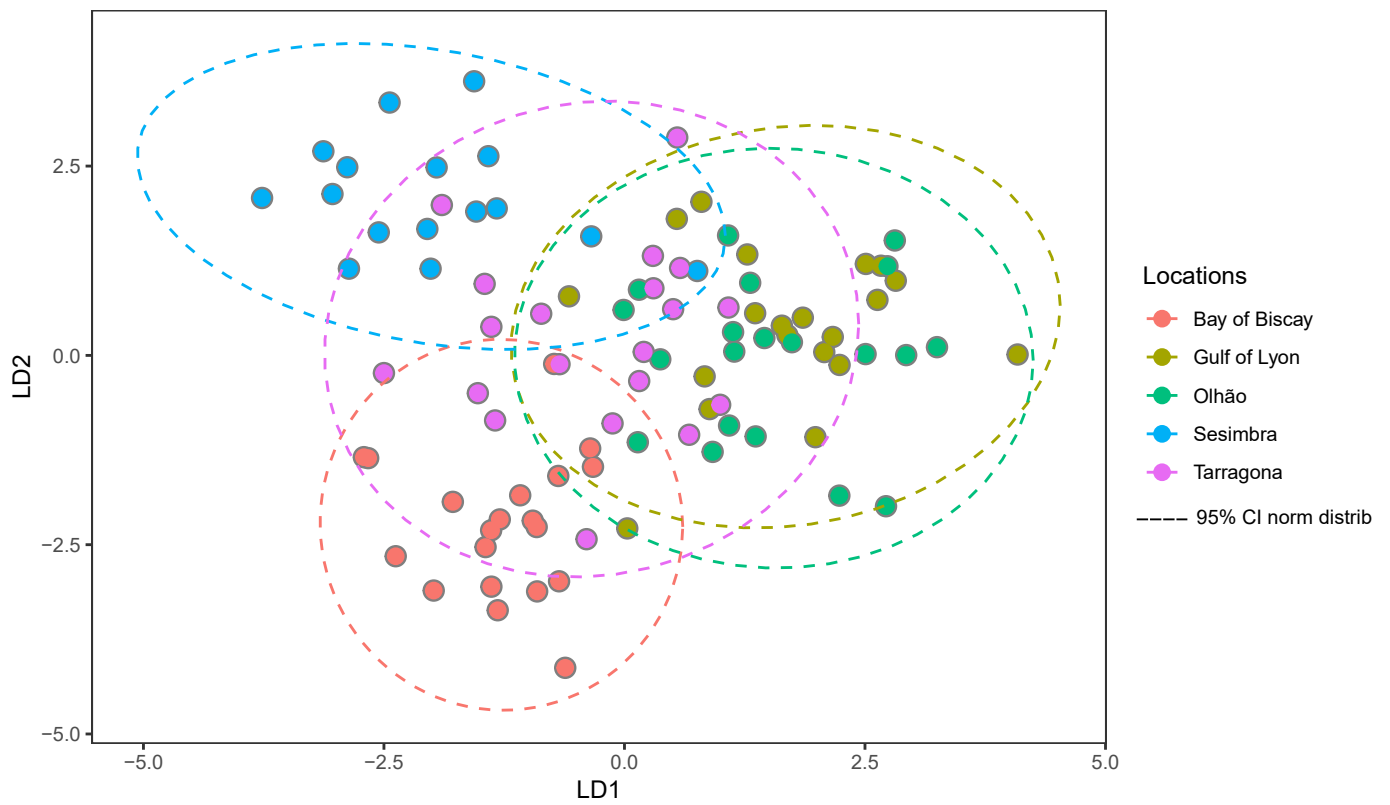

# B)

K=5

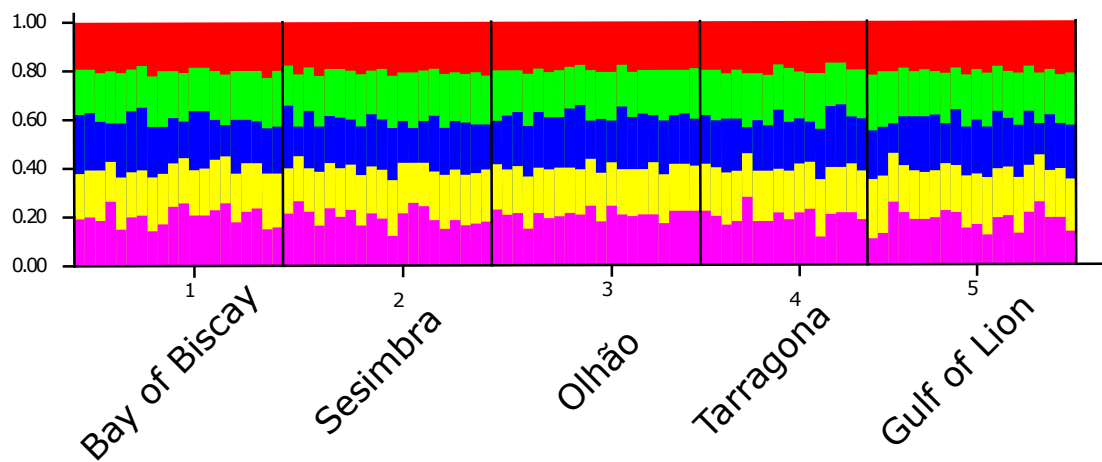

Supplement: s1 [file s1]

A)

Comparing  $H_o$  and  $H_e$  across populations

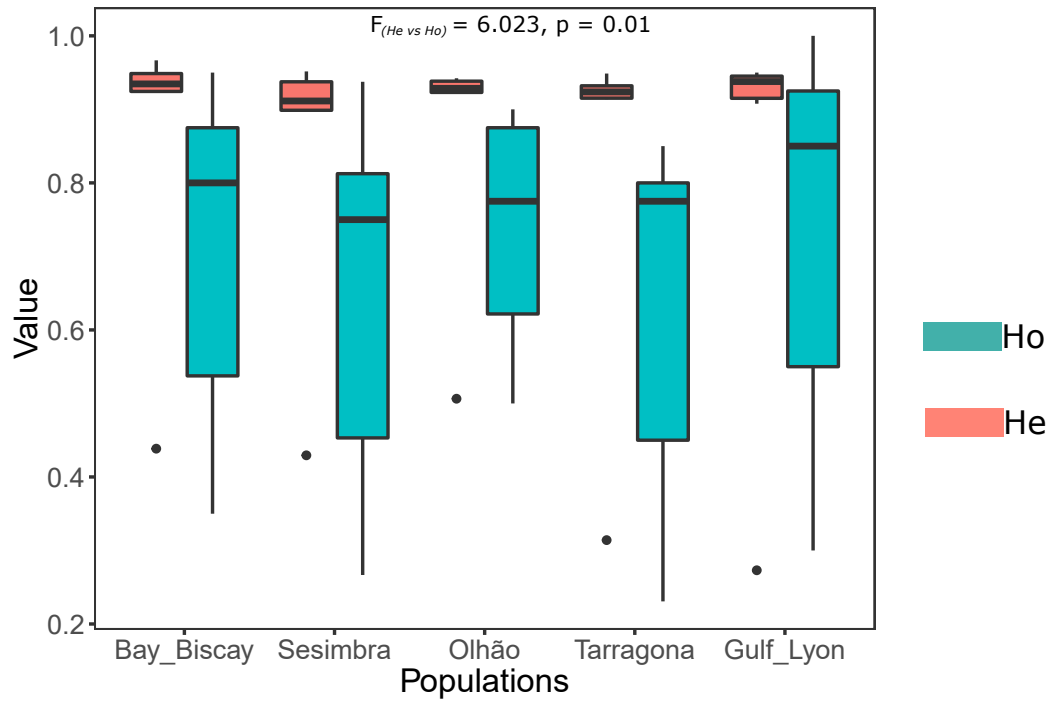

B)

Average  $F_{st}$  per locus

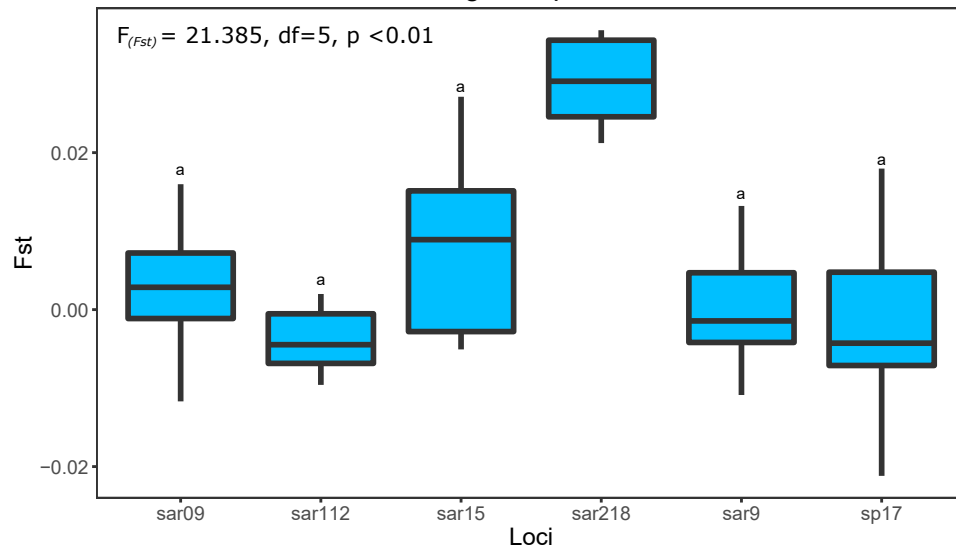

Supplement: s1 [file s1]

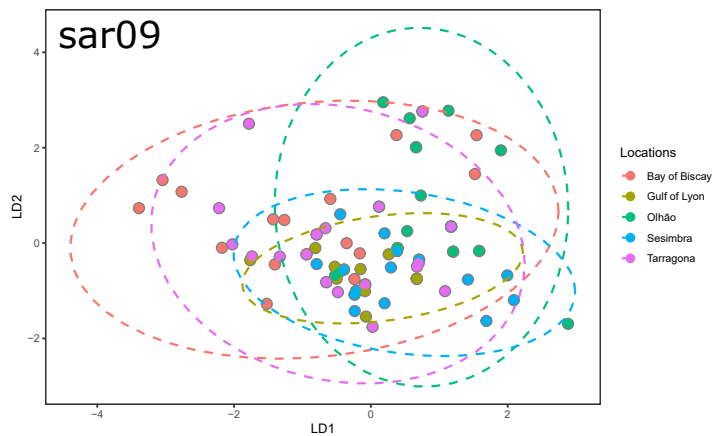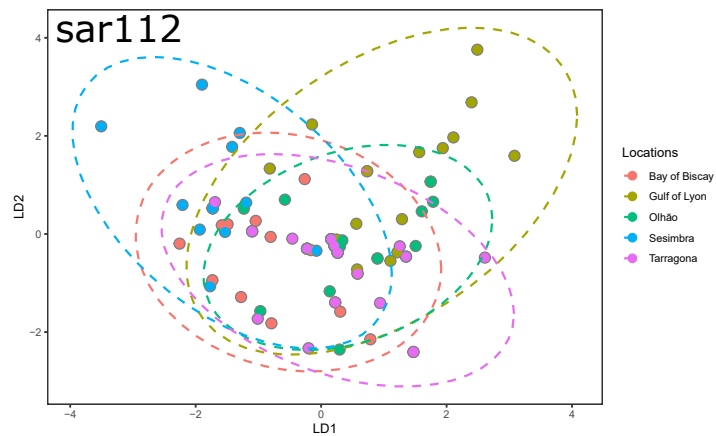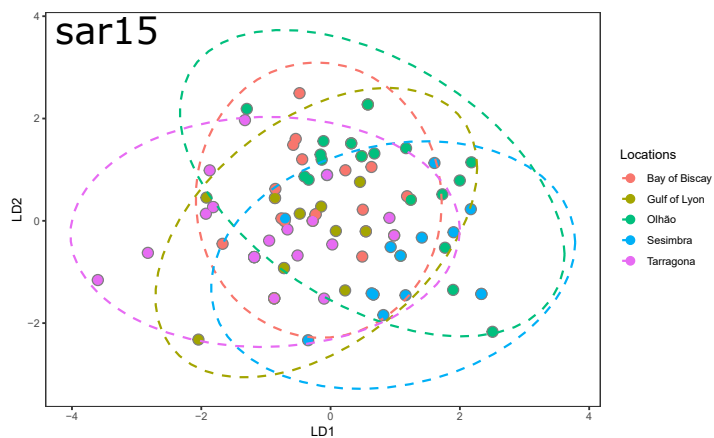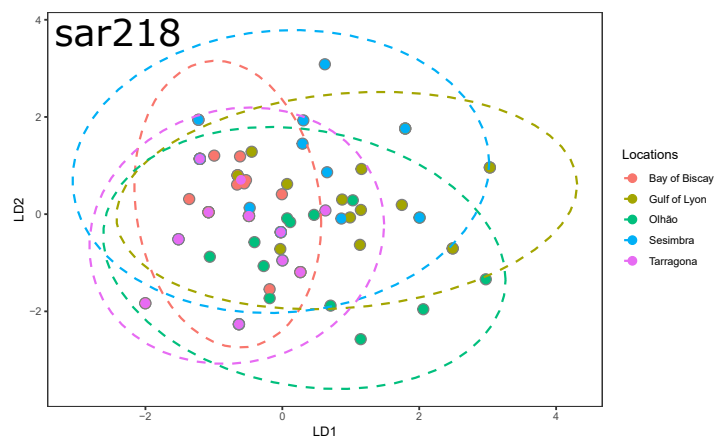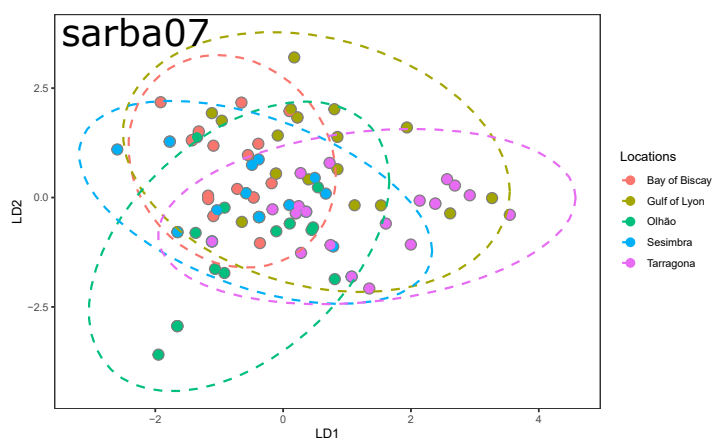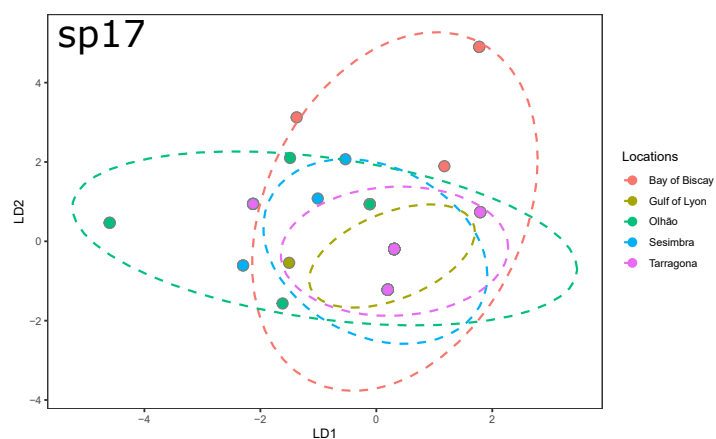

Supplement: s1 [file s1]
